# Supplementary material for: 3D architecture constructed via the confined growth of MoS2nanosheets in nanoporous carbon derived from metal–organic frameworks for efficient hydrogen production
Source: Royal Society of Chemistry journal article supplement (doi:10.1039/c5nr03810c), 2015-01-01
Supplement: c5nr03810c1.pdf [file c5nr03810c1.pdf]

## Electronic Supplementary Information (ESI)

### 3D Architecture Constructed via Confined Growth of MoS<sub>2</sub> Nanosheets in Nanoporous Carbon Derived from Metal-Organic Frameworks for Efficient Hydrogen Production

Yun Liu,<sup>‡abcd</sup> Xiaoli Zhou,<sup>‡abcd</sup> Tao Ding<sup>abcd</sup> Chunde Wang<sup>abcd</sup> and Qing Yang<sup>\*abcd</sup>

<sup>a</sup> Hefei National Laboratory of Physical Sciences at the Microscale, University of Science and Technology of China (USTC), Hefei 230026, Anhui, P. R. China.

<sup>b</sup> Department of Chemistry, USTC, Hefei 230026, Anhui, P. R. China.

<sup>c</sup> Laboratory of Nanomaterials for Energy Conversion, USTC, Hefei 230026, Anhui, P. R. China.

<sup>d</sup> Synergetic Innovation Center of Quantum Information & Quantum Physics, USTC, Hefei 230026, P. R. China.

\* Corresponding author. E-mail: qyoung@ustc.edu.cn; Fax: +86-551-63606266;  
Tel: +86-551-63600243.

‡ These authors contributed equally to this work

## 1. Experimental section:

**Materials.** All reagents were used directly without further purification.

**Synthesis of MoS<sub>2</sub>/3D-NPC composite.** The 3D-NPC was prepared via Ming Hu method.<sup>S1, S2</sup> To prepare MoS<sub>2</sub>/3D-NPC composites, 20 mg (NH<sub>4</sub>)<sub>2</sub>MoS<sub>4</sub> (Sigma Aldrich) and 10 mg 3D-NPC was added in 10 mL DMF. The mixture was stirred at room temperature for approximately 12 h until a homogeneous solution was achieved. After that, 0.1 mL N<sub>2</sub>H<sub>4</sub>•H<sub>2</sub>O was added into the suspension. After stirring for another 30 min, the mixed solution was transferred into a 20 mL Teflon-lined autoclave, which was sealed and heated in an oven at 200 °C for 35 min, 1 h, 5 h and 10 h with no intentional control of ramping or cooling rate. Products were collected by centrifugation at 10000 rpm for 4 min, washed with DI water and recollected by centrifugation. The washing step was repeated for at least 4 times to ensure that ions and possible remnants were removed. Finally, the product was dried 12 h at 70 °C in an oven.

**Synthesis of free MoS<sub>2</sub> nanoparticles.** The synthetic procedure of free MoS<sub>2</sub> nanoparticles is the same as the one for preparing the MoS<sub>2</sub>/3D-NPC composites except for that 3D-NPC was removed from the synthetic procedure.

**Electrochemical measurements.** 4 mg of catalyst and 40 uL of 5 wt% Nafion solution (Sigma Aldrich) were dispersed in 1 mL of 4:1 v/v water/DMF by sonicating at least 30 min to form a homogeneous solution. Then 5 uL of the catalyst ink (containing 20 uL of catalyst) was loaded onto a glassy carbon electrode of 3 mm in diameter (loading ~ 0.285 mg cm<sup>-2</sup>). Linear sweep voltammetry (using the CHI660E Instruments) with scan rate of 5 mV s<sup>-1</sup> was conducted in Ar-saturated 0.5M H<sub>2</sub>SO<sub>4</sub> using Ag/AgCl (in saturated KCl solution) electrode as the reference electrode, a platinum electrode as the counter electrode and the glassy carbon electrode as the working electrode. The electrochemical impedance spectroscopy measurement were carried out in the same configuration at overpotential  $\eta = 200$  mV from 10<sup>6</sup> – 0.02 Hz at the amplitude of 5 mV. For the stability tests, the potential of the electrodes cycled between a potential range from -0.25 to 0.2V vs RHE at a sweep rate of 50 mV s<sup>-1</sup>. At the end of the cycling experiment, the polarization curve was obtained with a sweep rate of 5 mV s<sup>-1</sup>. The current density was normalized by geometric electrode area (0.07 cm<sup>2</sup>). The potentials reported in our work were referenced to the reversible hydrogen electrode (RHE):  $E_{\text{RHE}} = E_{\text{Ag/AgCl}} + 0.059 \times \text{pH} + 0.1981$  (in this test, pH=0.04). All data were reported with iR compensation.

**Characterization.** The products were characterized using X-ray powder diffraction (XRD, performed on a Philips X'pert PRO X-ray diffractometer, Cu K $\alpha$ ,  $\lambda = 1.54182$  Å), scanning electron microscope (SEM, JSM-6700F). The high resolution TEM (HRTEM), high-angle annular dark-field scanning transmission electron microscopy (HAADF-STEM) and corresponding energy-dispersive spectroscopic (EDS) mapping analyses were performed on a JEOL JEM-ARF200F TEM/STEM with a spherical aberration corrector. X-ray photoelectron spectra (XPS) were acquired on an ESCALAB MK II with Mg K $\alpha$  as the excitation source. The nitrogen absorption/desorption isotherms were obtained at 77 K on an ASAP 2020 accelerated surface area and porosimetry instrument (Micromeritics). The electrical measurements were carried out using a

Keithley 4200-SCS Semiconductor characterization system by a two probe configuration.

## 2. Supplementary Figures

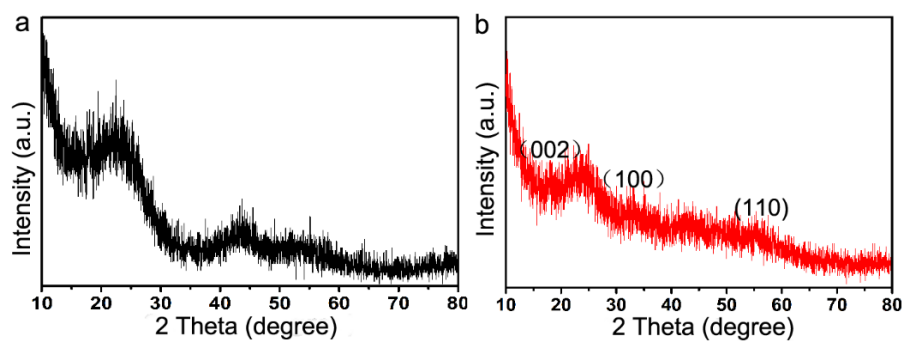

**Fig. S1.** XRD patterns of (a) 3D-NPC, and (b) MoS<sub>2</sub>/3D-NPC composites using DMF as the solvent with reaction time for 1h.

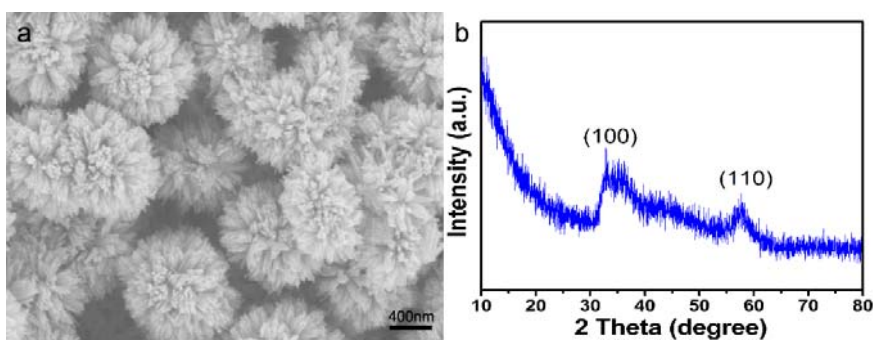

**Fig. S2.** (a) SEM image and (b) XRD pattern of the MoS<sub>2</sub> nanoparticles obtained by using DMF as the solvent with reaction time for 1h.

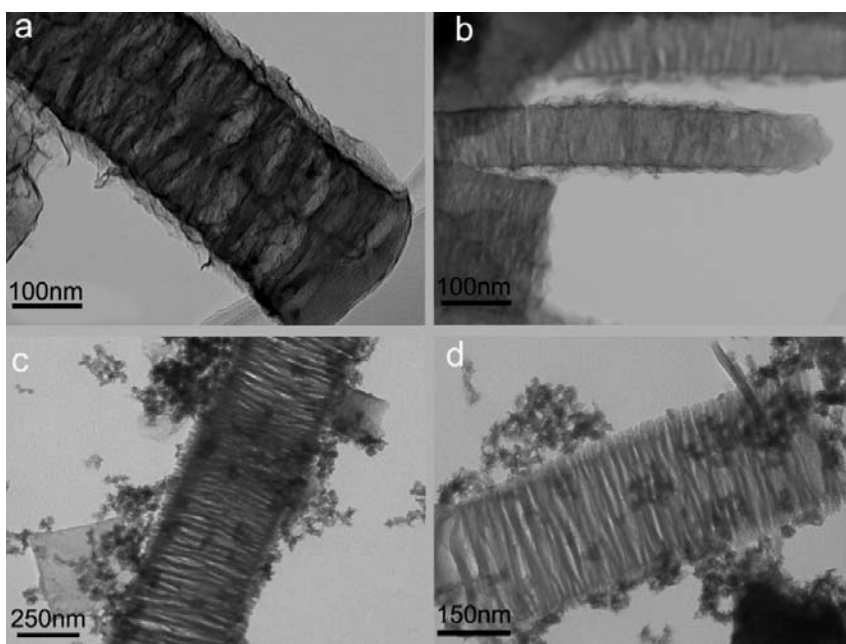

**Fig. S3.** (a) Additional TEM image of the as-obtained MoS<sub>2</sub>/3D-NPC composites in the media of

DMF, and (b) TEM image of the MoS<sub>2</sub>/3D-NPC composites after repeated washing and ultrasonication cycles. TEM images of the samples by replacing the DMF with (c) water and (d) iso-propanol as solvent. All the reaction time was 1h.

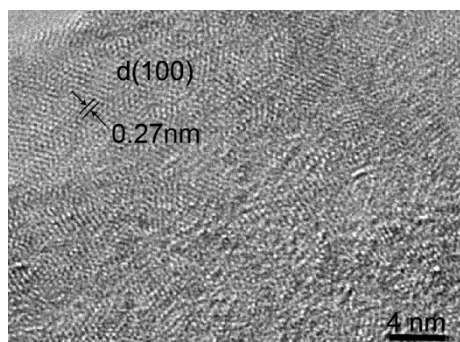

**Fig. S4.** HRTEM image of the MoS<sub>2</sub>/3D-NPC composites, showing low crystallinity of MoS<sub>2</sub> nanosheets.

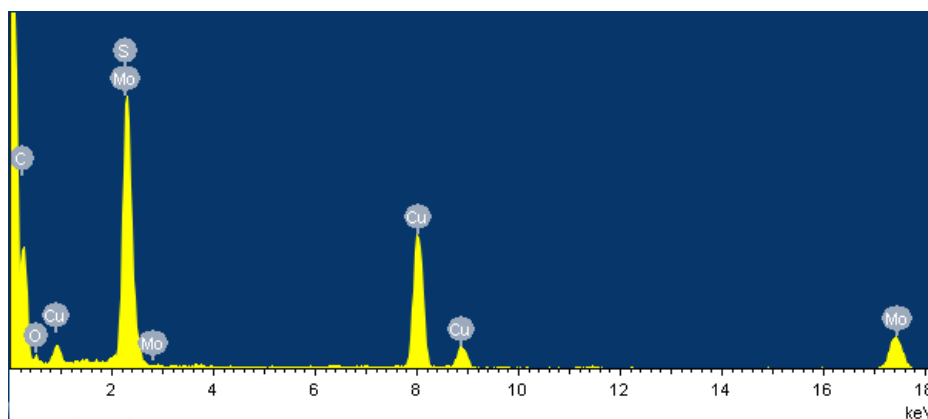

**Fig. S5.** EDX spectra of the MoS<sub>2</sub>/3D-NPC composites. The signal of Cu arises from the TEM grid.

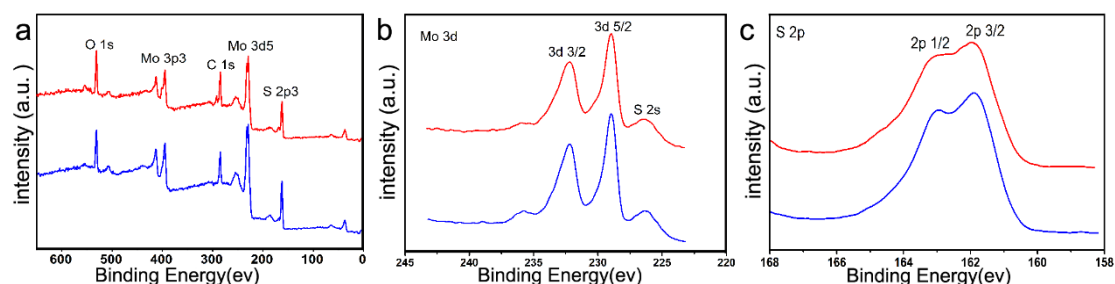

**Fig. S6.** (a) XPS survey spectra of the MoS<sub>2</sub>/3D-NPC composites and pure MoS<sub>2</sub> nanoparticles. (b) - (d) high-resolution XPS spectra of the Mo 3d and S 2p for the MoS<sub>2</sub>/3D-NPC composites (red lines) and pure MoS<sub>2</sub> nanoparticles (blue lines).

We have compared Mo 3d and S 2p XPS spectra of the as-synthesized MoS<sub>2</sub>/3D-NPC composites (red line) with pure MoS<sub>2</sub> nanoparticles (blue line). As shown in Figure S10, no obvious shift is observed between the MoS<sub>2</sub>/3D-NPC composites and pure MoS<sub>2</sub> nanoparticles. For the MoS<sub>2</sub>/3D-NPC composites synthesized in our experimental condition, the interaction

between MoS<sub>2</sub> nanosheets and 3D-NPC is not strong enough to influence the valence states of the elements. Moreover, according to the literatures of other MoS<sub>2</sub>-based hybrids, we found that there were no obvious changes of valence states of the elements in previous reports, but the hybrids system showed highly improved performance for HER.

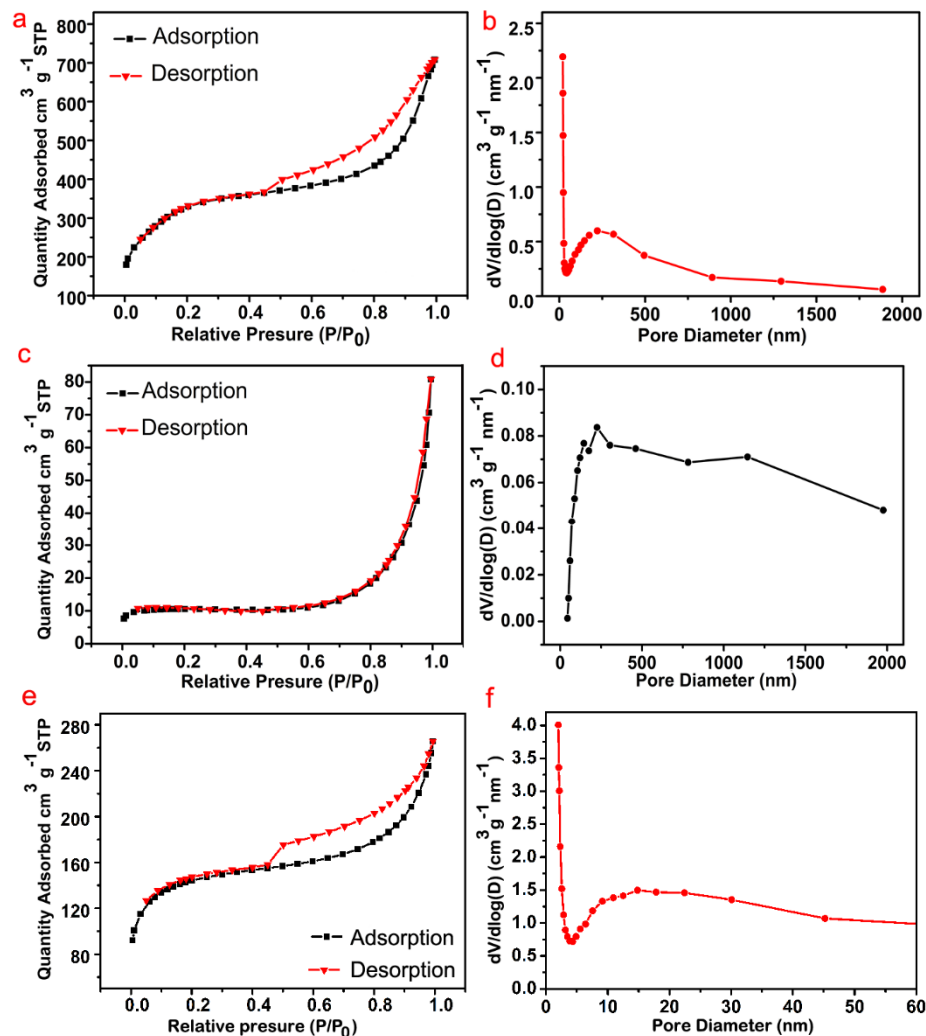

**Fig. S7.** (a) N<sub>2</sub> adsorption/desorption isotherms and (b) pore size distribution of pure 3D-NPC. (c) N<sub>2</sub> adsorption/desorption isotherms and (d) pore size distribution of pure MoS<sub>2</sub> nanoparticles. (e) N<sub>2</sub> adsorption/desorption isotherms and (f) pore size distribution of the MoS<sub>2</sub>/3D-NPC composites. All data are obtained by using the BJH method.

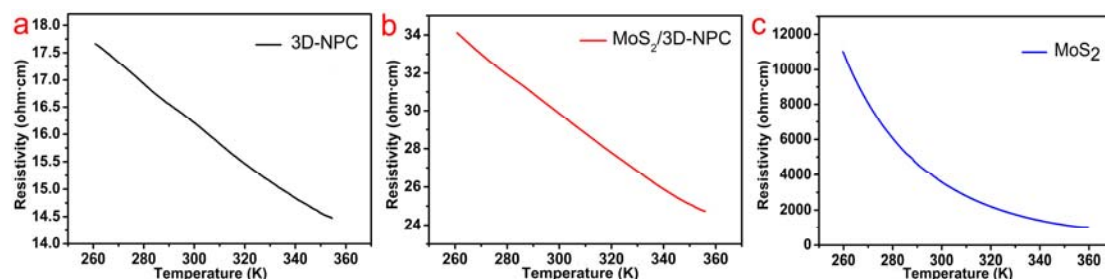

**Fig. S8.** Temperature-dependent electrical resistivity of (a) the 3D-NPC, (b) the MoS<sub>2</sub>/3D-NPC composites, and (c) the MoS<sub>2</sub> nanoparticles, respectively.

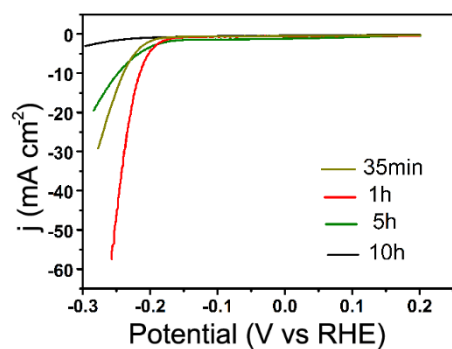

**Fig. S9.** Polarization curves of the MoS<sub>2</sub>/3D-NPC composites with reaction time for 35min, 1h, 5h and 10h, respectively.

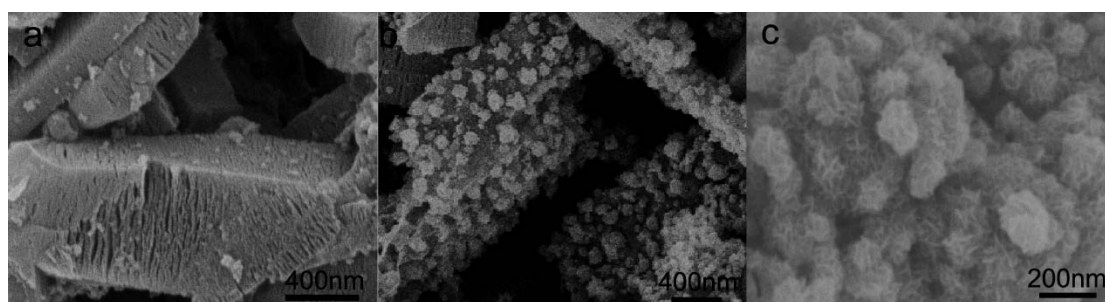

**Fig. S10.** SEM images of the MoS<sub>2</sub>/3D-NPC composite obtained after (a) 35min, (b) 5h, and (c) 10h, respectively.

## References

- S1. Comotti, A.; Bracco, S.; Sozzani, P.; Horike, S.; Matsuda, R.; Chen, J.; Takata, M.; Kubota, Y.; Kitagawa, S. *J. Am. Chem. Soc.* 2008, **130**, 13664-13672.
- S2. Hu, M.; Reboul, J.; Furukawa, S.; Torad, N. L.; Ji, Q.; Srinivasu, P.; Ariga, K.; Kitagawa, S.; Yamauchi, Y. *J. Am. Chem. Soc.* 2012, **134**, 2864-2867.
